# Supplementary material for: Large-scale transcriptome changes in the process of long-term visual memory formation in the bumblebee, Bombus terrestris
Source: PubMed Central journal article supplement (PMC5765018; doi:10.1038/s41598-017-18836-3), 2018-01-11
Supplement: 41598_2017_18836_MOESM1_ESM.pdf [file 41598_2017_18836_MOESM1_ESM.pdf]

1 Title: **Large-scale transcriptome changes in the process of long-term visual memory**  
 2 **formation in the bumblebee, *Bombus terrestris***

3 Li Li<sup>1\*</sup>, Songkun Su<sup>2\*</sup>, Clint J. Perry<sup>1</sup>, Maurice R. Elphick<sup>1</sup>, Lars Chittka<sup>1</sup>, Eirik Søvik<sup>3</sup>

6 **Supplementary Information**

8 **Supplementary Figures**

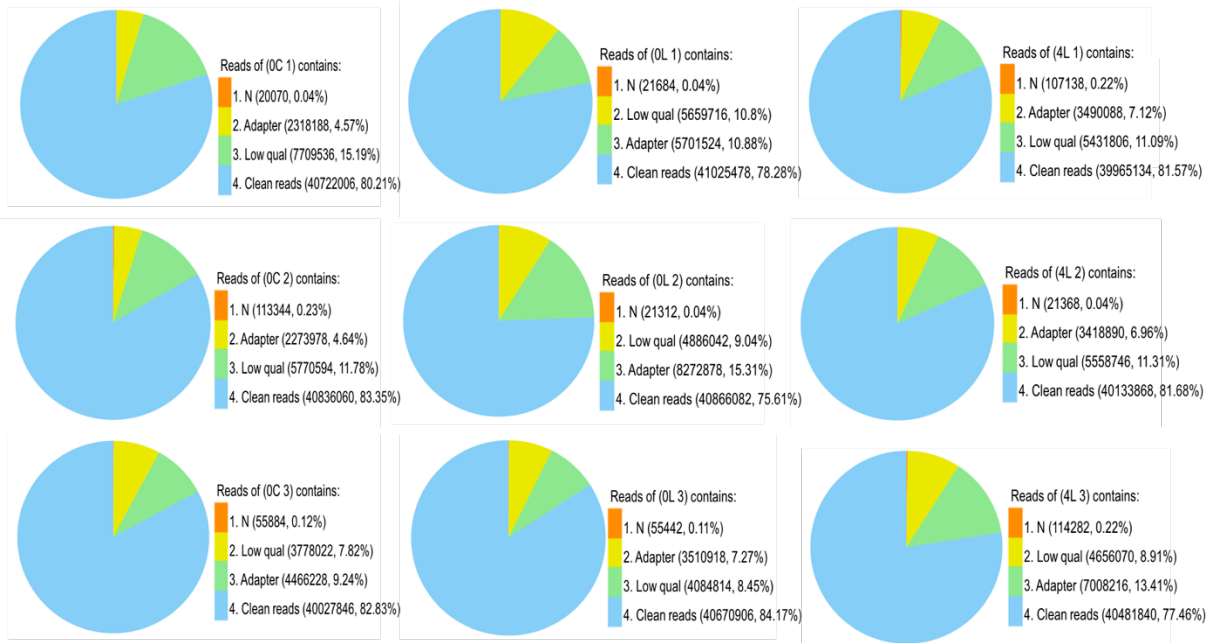

10  
 11 **Supplementary Figure 1 | Classification of raw reads for each sample.** Before data analysis, the reads  
 12 with more than 10% unknown nucleotides (N), with adapters (Adapter), and low quality reads (Low qual)  
 13 were removed from raw reads. The remaining reads were the clean reads. The value indicates reads  
 14 number and its ratio on raw reads. OC: 0-hour Control; OL: 0-hour Learning; 4L: 4-hour Learning.

15

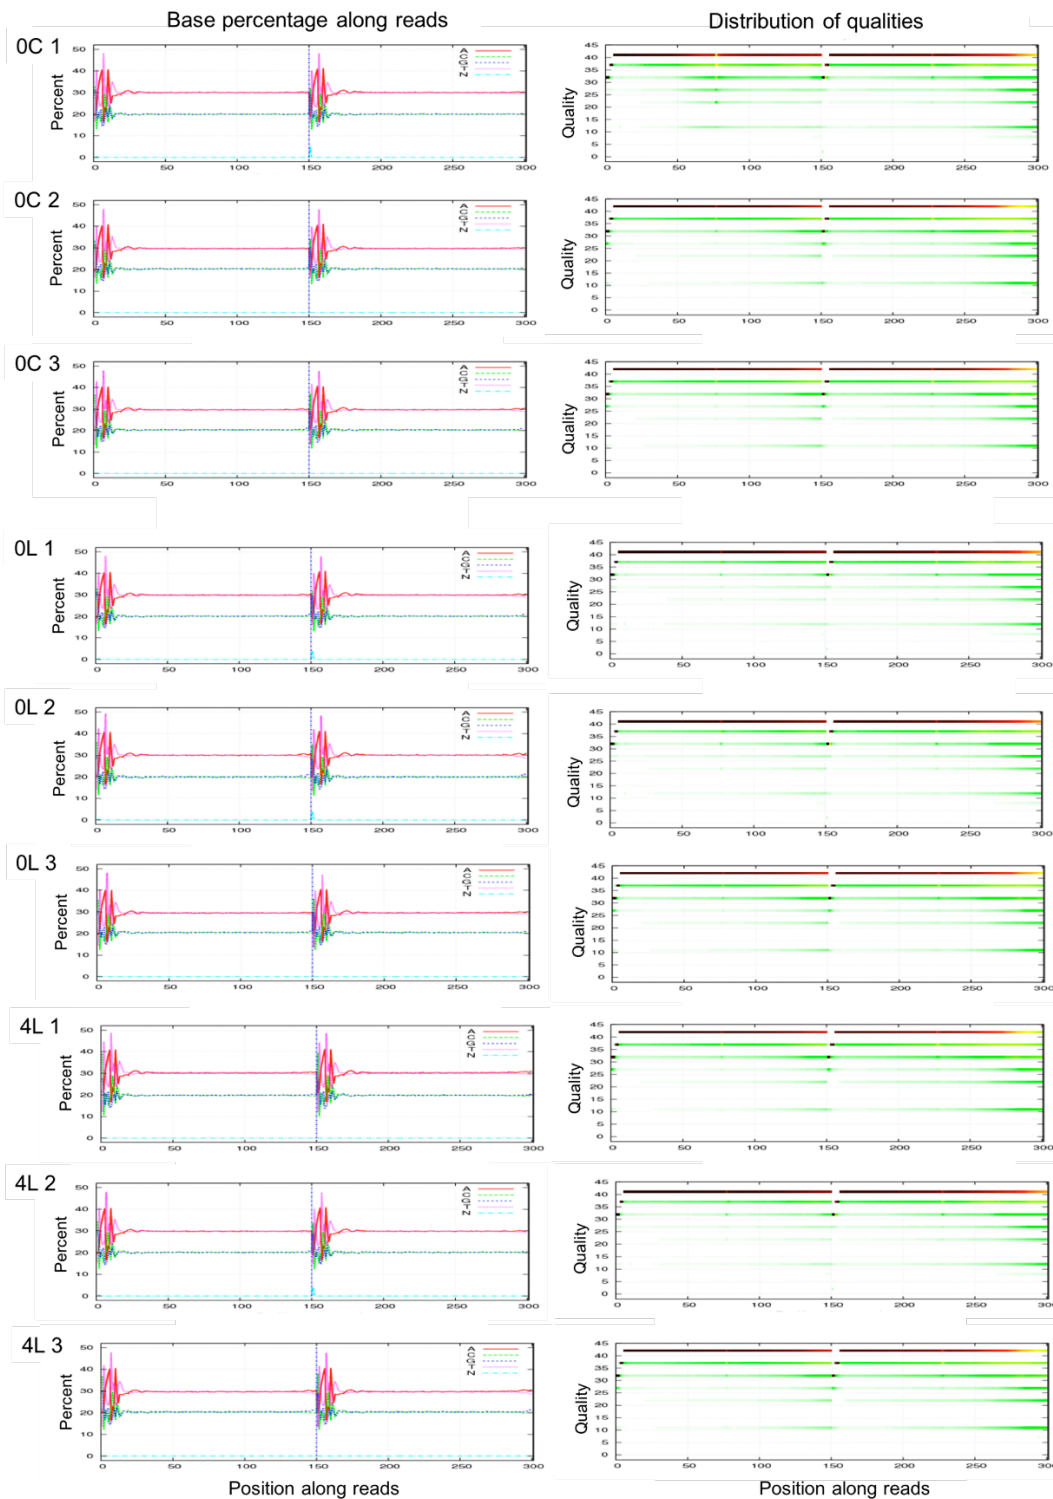

16

17 **Supplementary Figure 2 | Quality assessment of sequencing paired-end reads. (Left) The nucleotide**  
 18 **composition of RNA-Seq reads.** The percentage of each nucleotide (Y-axis) is plotted against read length  
 19 (Y-axis; 1-150bp and 151-300bp represent the reads from end 1 and end 2 separately). Colors indicate  
 20 different nucleotides (A = red; C = Green; G = Blue; T = Magenta; N: Light Blue). A curve should be  
 21 overlapped with T curve, while G curve be overlapped with C curve, which can be seen from all our

22 samples. If abnormal condition happens during sequencing, it may show an unbalanced composition. Note  
 23 that the changing composition in the beginning of reads is common in RNA-Seq data. **(Right) Quality**  
 24 **distribution of bases along RNA-Seq reads.** Each base quality (Y-axis) is plotted against read length (X-  
 25 axis; 1-150bp and 151-300bp represent the reads from end 1 and end 2 separately). Quality score reflects  
 26 the sequencing error rate and the relationship between them is sequencing error rate 1%, 0.1% and 0.01%  
 27 corresponds to quality score 20, 30 and 40. Most of base positions in our sequencing showed good quality  
 28 (score >20). 0C: 0-hour Control; 0L: 0-hour Learning; 4L: 4-hour Learning.

29

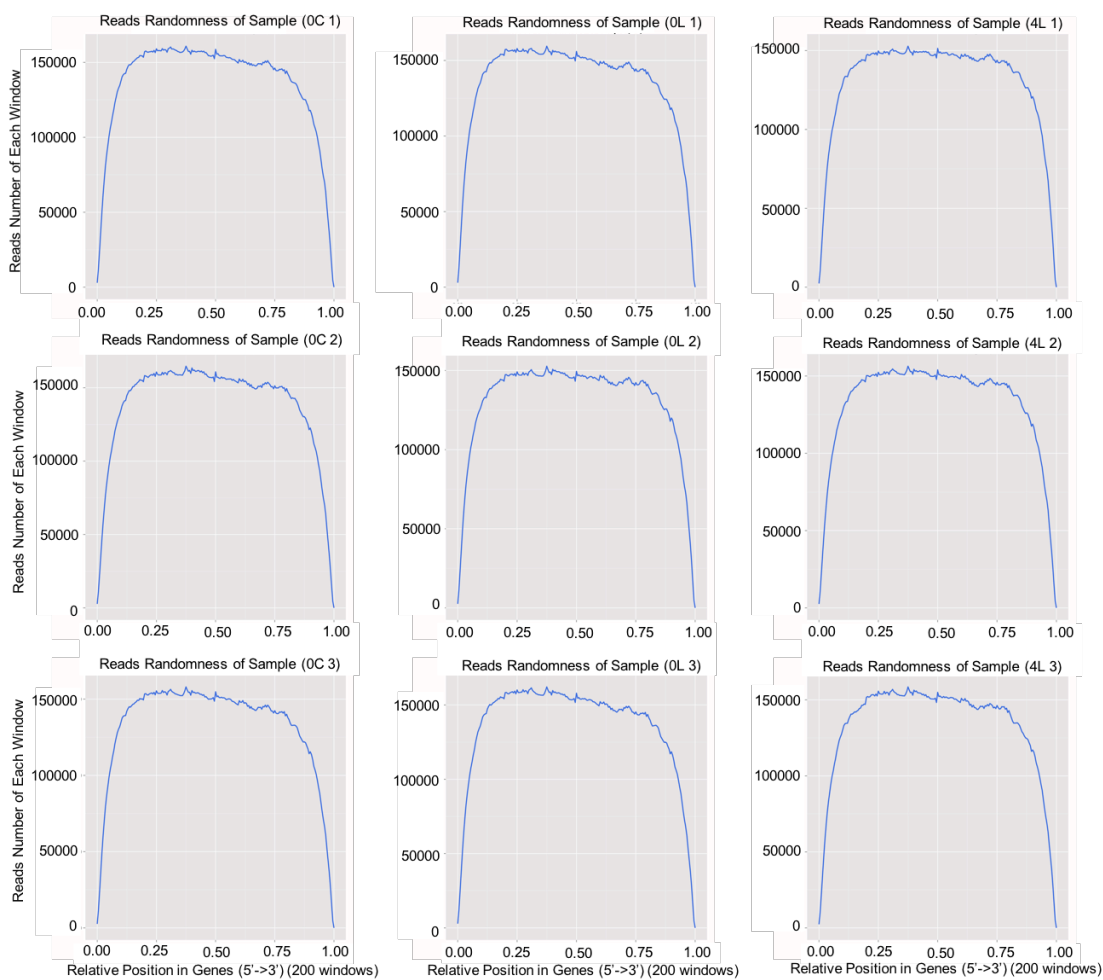

30

31 **Supplementary Figure 3 | The distributions of reads on bumblebee (*Bombus terrestris*) reference**  
 32 **genes.** X-axis is the relative position in genes which is calculated as the ratio between read location and the  
 33 gene length and Y-axis is the number of reads. Reads should be evenly distributed on reference genes,  
 34 otherwise it means the randomness is poor (i.e. reads prefer to specific gene region) which will affect

35 following analysis. The read randomness in all our samples is good as shown in the figure. 0C: 0-hour  
36 Control; 0L: 0-hour Learning; 4L: 4-hour Learning.

37  
38  
39

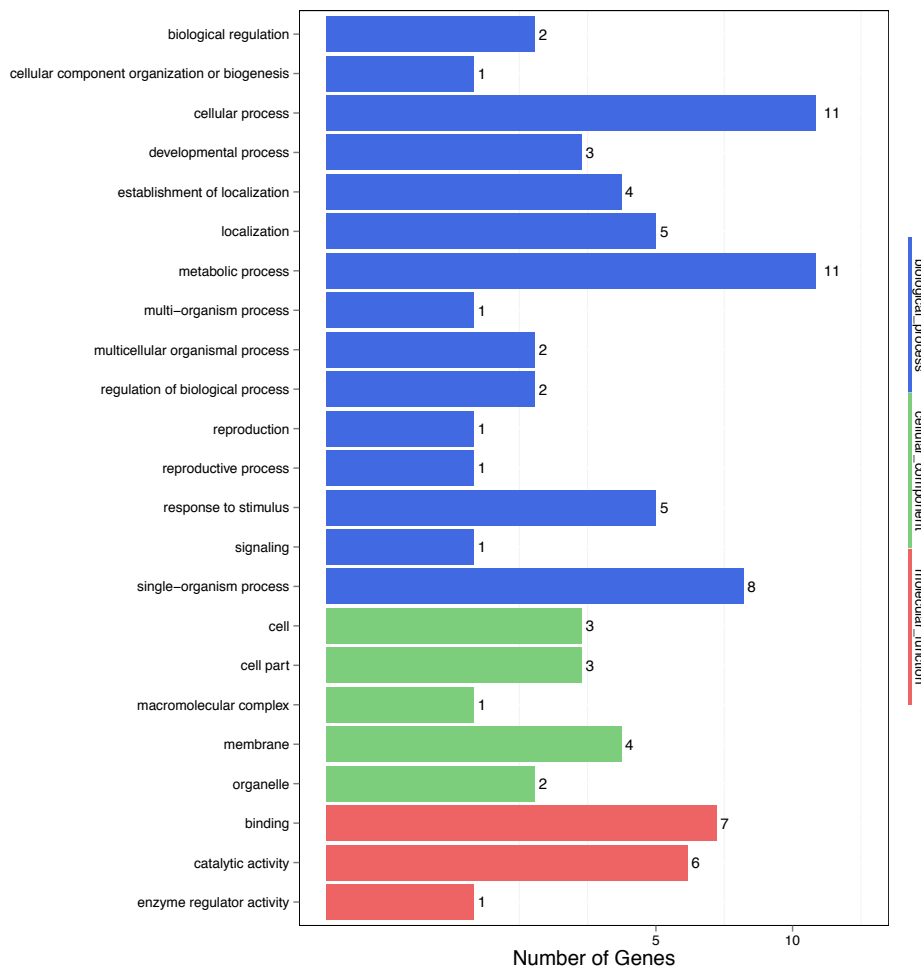

40

41 **Supplementary Figure 4 | GO functional classification of differentially expressed genes (DEGs).** The  
42 DEGs were annotated into three main categories: biological process, cellular component and molecular  
43 function. The number of genes in each GO terms were displayed and 58 of the 110 DEGs belonged to  
44 biological process.

45

46

47

48

49 **Supplementary Table**

50

51 **Supplementary Table 1 | The quality of RNA samples used for sequencing.** RNA concentration and  
 52 integrity were measured by Agilent 2100. Level A means the sample is qualified and the amount of sample  
 53 satisfies two times library construction or more. 0C: 0-hour Control; 0L: 0-hour Learning; 4L: 4-hour  
 54 Learning.

| Sample Name | Concentration (ng/μl) | Volume (μl) | Total Mass (μg) | RIN | Library Type                   | Test Result |
|-------------|-----------------------|-------------|-----------------|-----|--------------------------------|-------------|
| 0C 1        | 456                   | 55          | 25.08           | 7.6 | HiSeq Eukaryotic Transcriptome | Level A     |
| 0L 1        | 474                   | 55          | 26.07           | 7.7 | HiSeq Eukaryotic Transcriptome | Level A     |
| 4L 1        | 393                   | 56          | 22.01           | 7.9 | HiSeq Eukaryotic Transcriptome | Level A     |
| 0C 2        | 480                   | 57          | 27.36           | 7.9 | HiSeq Eukaryotic Transcriptome | Level A     |
| 0L 2        | 516                   | 57          | 29.41           | 8   | HiSeq Eukaryotic Transcriptome | Level A     |
| 4L 2        | 627                   | 57          | 35.74           | 7.9 | HiSeq Eukaryotic Transcriptome | Level A     |
| 0C 3        | 528                   | 57          | 30.1            | 8   | HiSeq Eukaryotic Transcriptome | Level A     |
| 0L 3        | 549                   | 54          | 29.65           | 8   | HiSeq Eukaryotic Transcriptome | Level A     |
| 4L 3        | 639                   | 57          | 36.42           | 7.9 | HiSeq Eukaryotic Transcriptome | Level A     |

55

56

57
